# Supplementary material for: Influence of Cluster-Situated Regulator PteF in Filipin Biosynthetic Cluster on Avermectin Biosynthesis in Streptomyces avermitilis
Source: MDPI journal article supplement (doi:10.3390/biology13050344), 2024-05-15
Supplement: s1 [file s1]

# Influence of Cluster-Situated Regulator PteF in Filipin Biosynthetic Cluster on Avermectin Biosynthesis in *Streptomyces Avermitilis*

Guozhong Du <sup>1</sup>, Xue Yang <sup>1</sup>, Zhengxiong Wu <sup>1</sup>, Minghui Pan <sup>1,2</sup>, Zhuoxu Dong <sup>1,2</sup>, Yanyan Zhang <sup>1</sup>, Wensheng Xiang <sup>1,2,\*</sup>, Shanshan Li <sup>1,\*</sup>

<sup>1</sup> State Key Laboratory for Biology of Plant Diseases and Insect Pests, Institute of Plant Protection, Chinese Academy of Agricultural Sciences, No. 2 Yuanmingyuan West Road, Haidian District, Beijing 100193, China; dgz1005@163.com (G.D.); 82101211024@caas.cn (X.Y.); 17513232046@163.com (Z.W.); mhlu@163.com (M.P.); d15945317995@163.com (Z.D.); yyzhang@ippcaas.cn (Y.Z.)

<sup>2</sup> School of Life Science, Northeast Agricultural University, No. 59 Mucai Street, Xiangfang District, Harbin 150030, China

\* Correspondence: xiangwensheng@neau.edu.cn (W.X.); lishanshan01@caas.cn (S.L.)

**Table S1.** Strains and plasmids used in this work

| Name                            | Description                                                                                                                                                                                                               | Source       |
|---------------------------------|---------------------------------------------------------------------------------------------------------------------------------------------------------------------------------------------------------------------------|--------------|
| Strains                         |                                                                                                                                                                                                                           |              |
| <i>Escherichia coli</i>         |                                                                                                                                                                                                                           |              |
| JM109                           | General cloning host for plasmid manipulation                                                                                                                                                                             | Novagen      |
| ET12567(pUZ8002)                | Donor strain for conjugation between <i>E. coli</i> and <i>Streptomyces</i>                                                                                                                                               | [1]          |
| <i>Streptomyces avermitilis</i> |                                                                                                                                                                                                                           |              |
| S0                              | Low-yielding strain of avermectins, derived from <i>S. avermitilis</i> MA-4680 by random mutagenesis using ultraviolet mutagenesis and <i>N</i> -methyl- <i>N'</i> -nitroso- <i>N</i> -nitrosoguanidine (NTG) mutagenesis | CGMCC 4.8011 |
| savΔ <i>pteF</i>                | In-frame deleting the <i>pteF</i> gene in S0                                                                                                                                                                              | This work    |
| savΔ <i>pteR</i>                | In-frame deleting the <i>pteR</i> gene in S0                                                                                                                                                                              | This work    |
| Plasmids                        |                                                                                                                                                                                                                           |              |
| pKC1139                         | Am <sup>r</sup> , integrative <i>E. coli</i> - <i>Streptomyces</i> shuttle vector for gene disruption                                                                                                                     | [2]          |
| pKC1139::Δ <i>pteF</i>          | For in-frame deleting the <i>pteF</i> gene, generated from pKC1139                                                                                                                                                        | This work    |
| pKC1139::Δ <i>pteR</i>          | For in-frame deleting the <i>pteR</i> gene, generated from pKC1139                                                                                                                                                        | This work    |

**Table S2.** Primers used in this work

| Primers           | Sequence (5'-3') <sup>1</sup>                        | Usage                                          |
|-------------------|------------------------------------------------------|------------------------------------------------|
| $\Delta$ pteR-LF  | <b>TAAAACGACGGCCAGTGCCAAGCTT</b> ACCACGTGCGCTGATCAC  | For amplification of the left homologous arm   |
| $\Delta$ pteR-LR  | TGGATCCGTGCTCTGCCTC                                  | of <i>pteR</i>                                 |
| $\Delta$ pteR-RF  | <b>ACTGACGAGGCAGAGCACGGATCC</b> AGGCGAACGGCGCCTTCCAA | For amplification of the right homologous      |
| $\Delta$ pteR-RR  | <b>CGCGCGCGGCCGCGGATCCTCTAG</b> AGGCAGCACCTCCTCGAAGT | arm of <i>pteR</i>                             |
| $\Delta$ pteF-LF  | <b>TAAAACGACGGCCAGTGCCAAGCTT</b> CCTGGAACCAGTCGGAGGC | For amplification of the left homologous arm   |
| $\Delta$ pteF-LR  | ACACAGGCCCGGAGTTGCA                                  | of <i>pteF</i>                                 |
| $\Delta$ pteF-RF  | <b>GGCACCTGCAACTCCGGGCCTGTGTG</b> TCGAGCACAGGATCGCCG | For amplification of the left homologous arm   |
| $\Delta$ pteF-RR  | <b>CGCGCGCGGCCGCGGATCCTCTAG</b> ATGATGACGCGCTCGATGTT | of <i>pteF</i>                                 |
| $\Delta$ pteRY-F  | GAAGGAACGGAAGGAAGGGAG                                | For short fragment verification of <i>pteR</i> |
| $\Delta$ pteRY-R  | CAGGAAACTTGGGCGAAATAAA                               | deletion mutant                                |
| $\Delta$ pteFY-F  | TCGGAGGTAAAGGCATGAACG                                | For short fragment verification of <i>pteF</i> |
| $\Delta$ pteFY-R  | AGATGAAAGATGAATCGGAGGG                               | deletion mutant                                |
| $\Delta$ pteRLY-F | CAAGCCCGTCGAGGAACTG                                  | For long fragment verification of <i>pteR</i>  |
| $\Delta$ pteRLY-R | CCGTGGTTGTTGCCGTAGAG                                 | deletion mutant                                |
| $\Delta$ pteFLY-F | TGAGCAGGTCAAGGGAGGC                                  | For long fragment verification of <i>pteF</i>  |
| $\Delta$ pteFLY-R | GAGTCGTTCTTTACGGTTTCG                                | deletion mutant                                |

<sup>1</sup> Bold type characters indicate the homologous fragments

**Table S3.** Genes significantly differentially expressed in PKS BGCs

| Cluster      | Production | Gene id  | Genome description                                                       | log <sub>2</sub> (fold change) at<br>day 2 <sup>1</sup> | log <sub>2</sub> (fold change)<br>at day 6 <sup>1</sup> |
|--------------|------------|----------|--------------------------------------------------------------------------|---------------------------------------------------------|---------------------------------------------------------|
| <i>pks11</i> | Unknown    | GM000247 | putative partial polyketide synthase (type-II KS), partial               | -1.04                                                   | 1.00                                                    |
|              |            | GM000249 | putative polyketide synthase (type-II AT + aminotransferase),<br>partial | 0.22                                                    | -1.00                                                   |
| <i>pte</i>   | Filipin    | GM000690 | oleoyl-ACP hydrolase                                                     | 2.37                                                    | 2.88                                                    |
|              |            | GM000691 | cholesterol oxidase                                                      | 2.42                                                    | 2.76                                                    |
|              |            | GM000695 | ferredoxine                                                              | -2.24                                                   | -2.33                                                   |
|              |            | GM000696 | cytochrome P450 hydroxylase                                              | -1.98                                                   | -2.55                                                   |
|              |            | GM000697 | cytochrome P450 hydroxylase                                              | -1.85                                                   | -2.29                                                   |
|              |            | GM000698 | cytochrome P450                                                          | -1.72                                                   | -2.39                                                   |
|              |            | GM000699 | crotonyl-CoA reductase                                                   | -1.96                                                   | -2.44                                                   |
|              |            | GM000700 | modular polyketide synthase, partial                                     | -1.78                                                   | -2.25                                                   |
|              |            | GM000701 | modular polyketide synthase, partial                                     | -1.84                                                   | -2.20                                                   |
|              |            | GM000702 | modular polyketide synthase, partial                                     | -1.93                                                   | -2.20                                                   |
|              |            | GM000703 | modular polyketide synthase, partial                                     | -1.82                                                   | -2.19                                                   |
|              |            | GM000704 | modular polyketide synthase, partial                                     | -1.78                                                   | -2.28                                                   |
|              |            | GM000705 | modular polyketide synthase, partial                                     | -1.91                                                   | -2.29                                                   |
|              |            | GM000706 | modular polyketide synthase, partial                                     | -2.04                                                   | -2.14                                                   |
|              |            | GM000707 | modular polyketide synthase, partial                                     | -2.13                                                   | -2.09                                                   |
|              |            | GM000708 | modular polyketide synthase, partial                                     | -2.01                                                   | -2.14                                                   |
|              |            | GM000709 | modular polyketide synthase, partial                                     | -2.07                                                   | -2.12                                                   |
|              |            | GM000710 | modular polyketide synthase, partial                                     | -2.53                                                   | -2.27                                                   |
|              |            | GM000711 | modular polyketide synthase, partial                                     | -2.00                                                   | -2.19                                                   |

|             |            |          |                                               |              |              |
|-------------|------------|----------|-----------------------------------------------|--------------|--------------|
|             |            | GM000712 | modular polyketide synthase, partial          | <b>-2.16</b> | <b>-1.74</b> |
|             |            | GM000713 | modular polyketide synthase, partial          | <b>-1.87</b> | <b>-2.22</b> |
|             |            | GM000714 | modular polyketide synthase, partial          | <b>-1.94</b> | <b>-2.22</b> |
|             |            | GM000715 | modular polyketide synthase, partial          | <b>-2.16</b> | <b>-2.25</b> |
|             |            | GM000716 | modular polyketide synthase, partial          | <b>-1.99</b> | <b>-2.26</b> |
|             |            | GM000717 | modular polyketide synthase, partial          | <b>-1.88</b> | <b>-2.14</b> |
|             |            | GM000718 | modular polyketide synthase, partial          | <b>-1.94</b> | <b>-2.23</b> |
|             |            | GM000719 | modular polyketide synthase, partial          | <b>-3.23</b> | <b>-1.77</b> |
|             |            | GM000720 | modular polyketide synthase, partial          | <b>-1.89</b> | <b>-2.17</b> |
|             |            | GM000721 | modular polyketide synthase, partial          | <b>-1.70</b> | <b>-2.35</b> |
| <i>ave</i>  | Avermectin | GM000868 | type I polyketide synthase AVES 1, partial    | <b>1.56</b>  | -0.04        |
|             |            | GM000881 | type I polyketide synthase AVES 2, partial    | <b>-1.58</b> | <b>1.74</b>  |
|             |            | GM000884 | type I polyketide synthase AVES 2, partial    | <b>-1.72</b> | 0.87         |
|             |            | GM000893 | type I polyketide synthase AVES 4, partial    | <b>-1.03</b> | 0.14         |
|             |            | GM000897 | type I polyketide synthase AVES 4, partial    | <b>-1.24</b> | -0.02        |
| <i>pks3</i> | Unknown    | GM002527 | putative 3-oxoacyl-ACP synthase III           | -0.99        | <b>1.01</b>  |
|             |            | GM002532 | putative acyl-CoA synthetase, partial         | <b>-4.58</b> | -0.06        |
|             |            | GM002533 | putative modular polyketide synthase, partial | <b>-1.15</b> | 0.47         |
|             |            | GM002534 | putative modular polyketide synthase, partial | <b>-2.07</b> | 0.68         |
|             |            | GM002535 | putative modular polyketide synthase, partial | <b>-2.88</b> | 0.39         |
|             |            | GM002536 | putative modular polyketide synthase, partial | <b>-4.04</b> | -0.18        |
|             |            | GM002537 | putative acyl carrier protein                 | <b>-1.65</b> | -0.11        |
| <i>pks5</i> | Unknown    | GM002641 | putative modular polyketide synthase, partial | 0.37         | <b>1.45</b>  |
|             |            | GM002643 | putative modular polyketide synthase, partial | <b>-1.79</b> | -0.10        |
|             |            | GM002644 | putative regulatory protein, partial          | 0.52         | <b>1.97</b>  |
|             |            | GM002646 | putative regulatory protein, partial          | <b>1.21</b>  | -0.60        |

|             |            |          |                                                                   |              |              |
|-------------|------------|----------|-------------------------------------------------------------------|--------------|--------------|
| <i>pks9</i> | Unknown    | GM002652 | putative 3-oxoacyl-ACP synthase II (probably chain length factor) | <b>-1.35</b> | 0.24         |
|             |            | GM002654 | putative cytochrome P450                                          | -0.24        | <b>-1.42</b> |
|             |            | GM002657 | putative ABC transporter permease protein, partial                | <b>-1.03</b> | <b>-2.94</b> |
|             |            | GM002658 | putative ABC transporter permease protein, partial                | -0.63        | <b>2.70</b>  |
| <i>pks8</i> | Unknown    | GM004430 | putative acyl carrier protein, partial                            | <b>1.38</b>  | <b>-1.25</b> |
|             |            | GM004434 | putative 3-oxoacyl-ACP synthase I, partial                        | --           | <b>1.43</b>  |
|             |            | GM004440 | putative acyl carrier protein                                     | <b>-1.05</b> | 0.55         |
| <i>olm</i>  | Oligomycin | GM005321 | putative P450-like protein                                        | <b>1.25</b>  | 0.41         |
|             |            | GM005323 | modular polyketide synthase, partial                              | <b>-1.22</b> | 0.36         |
|             |            | GM005326 | modular polyketide synthase, partial                              | 0.86         | <b>1.06</b>  |
|             |            | GM005329 | modular polyketide synthase, partial                              | <b>-2.82</b> | 0.48         |
| <i>pks4</i> | Unknown    | GM008451 | putative modular polyketide synthase, partial                     | <b>-1.60</b> | 0.21         |
|             |            | GM008452 | putative modular polyketide synthase, partial                     | <b>-1.55</b> | 0.78         |
|             |            | GM008456 | putative UDP-glucose: sterol glucosyltransferase, partial         | 0.43         | <b>2.43</b>  |
|             |            | GM008457 | cytochrome P450 hydroxylase                                       | <b>-1.48</b> | <b>1.59</b>  |

<sup>1</sup> Bold type characters indicate the changing was significant.

**Table S4.** Genes significantly differentially expressed at day 2

| Gene id  | Genome description                             | log <sub>2</sub> (fold change) |
|----------|------------------------------------------------|--------------------------------|
| GM000066 | putative ATP/GTP-binding protein               | -4.76                          |
| GM000095 | conserved hypothetical protein                 | -2.12                          |
| GM000202 | \                                              | -5.17                          |
| GM000222 | putative TetR-family transcriptional regulator | -1.68                          |
| GM000273 | putative IS5 family IS1647-like transposase    | 1.10                           |
| GM000279 | hypothetical protein                           | -1.12                          |
| GM000281 | helicase                                       | -4.66                          |
| GM000361 | F420-dependent oxidoreductase                  | -2.15                          |
| GM000375 | \                                              | -3.76                          |
| GM000499 | hypothetical protein, partial                  | -3.80                          |
| GM000630 | putative IS110 family ISLxx2-like transposase  | -2.61                          |
| GM000631 | \                                              | -5.51                          |
| GM000690 | oleoyl-ACP hydrolase                           | 2.37                           |
| GM000691 | cholesterol oxidase                            | 2.42                           |
| GM000692 | LuxR family transcriptional regulator          | -1.38                          |
| GM000695 | ferredoxine                                    | -2.24                          |
| GM000696 | cytochrome P450 hydroxylase                    | -1.98                          |
| GM000697 | \                                              | -1.85                          |
| GM000698 | cytochrome P450 hydroxylase                    | -1.72                          |
| GM000699 | crotonyl-CoA reductase                         | -1.96                          |
| GM000700 | hypothetical protein                           | -1.78                          |
| GM000701 | Acyl transferase                               | -1.84                          |
| GM000702 | polyketide synthase, partial                   | -1.93                          |
| GM000703 | polyketide synthase                            | -1.82                          |

|          |                                                |       |
|----------|------------------------------------------------|-------|
| GM000704 | modular polyketide synthase                    | -1.78 |
| GM000705 | modular polyketide synthase                    | -1.91 |
| GM000706 | modular polyketide synthase                    | -2.04 |
| GM000707 | hypothetical protein, partial                  | -2.13 |
| GM000708 | \                                              | -2.01 |
| GM000709 | polyketide synthase                            | -2.07 |
| GM000710 | polyketide synthase                            | -2.53 |
| GM000711 | hypothetical protein, partial                  | -2.00 |
| GM000712 | \                                              | -2.16 |
| GM000713 | \                                              | -1.87 |
| GM000714 | polyketide synthase, partial                   | -1.94 |
| GM000715 | Malonyl CoA-acyl carrier protein transacylase  | -2.16 |
| GM000716 | hypothetical protein, partial                  | -1.99 |
| GM000717 | hypothetical protein, partial                  | -1.88 |
| GM000718 | modular polyketide synthase                    | -1.94 |
| GM000719 | hypothetical protein, partial                  | -3.23 |
| GM000720 | modular polyketide synthase                    | -1.89 |
| GM000721 | EbeA                                           | -1.70 |
| GM000722 | \                                              | -3.42 |
| GM000723 | putative Tn3 family ISXc5-like transposase     | -2.00 |
| GM000749 | \                                              | -1.27 |
| GM000760 | hypothetical protein                           | -4.04 |
| GM000773 | \                                              | -3.97 |
| GM000932 | putative LacI-family transcriptional regulator | -1.24 |
| GM000983 | lycopene cyclase                               | 1.23  |
| GM001009 | putative membrane protein                      | -1.85 |



|          |                                                                        |       |
|----------|------------------------------------------------------------------------|-------|
| GM001042 | hypothetical protein                                                   | -2.85 |
| GM001103 | hypothetical protein                                                   | 2.34  |
| GM001184 | ABC transporter substrate-binding protein                              | -1.24 |
| GM001185 | putative branched-chain amino acid ABC transporter permease protein    | -1.06 |
| GM001186 | putative branched-chain amino acid ABC transporter permease protein    | -1.08 |
| GM001187 | putative branched-chain amino acid ABC transporter ATP-binding protein | -1.79 |
| GM001189 | putative RNA polymerase ECF-subfamily sigma factor                     | -1.30 |
| GM001201 | alkanesulfonate monooxygenase                                          | -3.71 |
| GM001272 | hypothetical protein                                                   | -1.43 |
| GM001503 | putative alpha-glucuronidase                                           | -1.17 |
| GM001685 | hypothetical protein                                                   | -1.42 |
| GM001689 | 3-ketosteroid-delta-1-dehydrogenase                                    | -2.51 |
| GM001879 | putative secreted chitinase I                                          | -1.37 |
| GM001883 | ArsR family transcriptional regulator                                  | -1.00 |
| GM001915 | putative 3-(2-hydroxyphenyl) propionic acid transporter                | -1.92 |
| GM001933 | hypothetical protei                                                    | -1.01 |
| GM002037 | \                                                                      | -5.38 |
| GM002248 | putative trypsin-like protease, secreted                               | -1.47 |
| GM002288 | putative xanthine dehydrogenase                                        | -1.33 |
| GM002328 | putative hydrolase                                                     | 1.21  |
| GM002367 | hypothetical protein                                                   | -1.26 |
| GM002424 | \                                                                      | -4.50 |
| GM002484 | hypothetical protein                                                   | -1.98 |
| GM002487 | putative transcriptional regulator                                     | -1.75 |
| GM002499 | alpha-mannosidase                                                      | -1.05 |
| GM002500 | alpha-mannosidase                                                      | -1.07 |

|          |                                                          |       |
|----------|----------------------------------------------------------|-------|
| GM002532 | \                                                        | -4.58 |
| GM002544 | \                                                        | -4.93 |
| GM002590 | \                                                        | -4.81 |
| GM002592 | \                                                        | -1.39 |
| GM002846 | \                                                        | -4.89 |
| GM002907 | putative multiple sugar ABC transporter permease protein | -1.73 |
| GM002934 | putative membrane protein                                | 1.02  |
| GM003206 | putative transmembrane sulfate transport protein         | -1.23 |
| GM003291 | 50S ribosomal protein L33 1                              | -1.08 |
| GM003407 | amino acid permease                                      | -1.33 |
| GM003410 | putative ABC transporter permease protein                | -1.15 |
| GM003414 | regulatory protein                                       | -5.22 |
| GM003473 | \                                                        | -3.02 |
| GM003574 | putative regulatory protein                              | -1.51 |
| GM003575 | hypothetical protein                                     | -1.22 |
| GM003618 | AsnC family transcriptional regulator                    | -1.47 |
| GM003782 | hypothetical protein                                     | -5.50 |
| GM003888 | hypothetical protein                                     | -2.59 |
| GM003939 | putative regulatory protein                              | 2.19  |
| GM003940 | hypothetical protein                                     | 1.79  |
| GM003976 | hypothetical protein                                     | 3.98  |
| GM004377 | hypothetical protein                                     | -3.38 |
| GM004378 | putative ATP-binding protein                             | -4.49 |
| GM004508 | peroxidase                                               | -3.07 |
| GM004833 | putative ABC transporter permease protein                | -3.74 |
| GM004874 | hypothetical protein                                     | -1.18 |

|          |                                                         |       |
|----------|---------------------------------------------------------|-------|
| GM005013 | putative export protein                                 | -1.01 |
| GM005014 | hypothetical protein                                    | -1.15 |
| GM005091 | putative peptide ABC transporter solute-binding protein | -1.35 |
| GM005092 | putative peptide ABC transporter permease protein       | -1.93 |
| GM005270 | integrase, partial                                      | -5.48 |
| GM005285 | \                                                       | -3.00 |
| GM005289 | hypothetical protein                                    | -2.02 |
| GM005356 | putative two-component system sensor kinase             | -1.06 |
| GM005357 | membrane protein                                        | -1.80 |
| GM005456 | putative neutral zinc metalloprotease, secreted         | -1.26 |
| GM005488 | putative peptide ABC transporter ATP-binding protein    | 1.66  |
| GM005812 | \                                                       | -3.74 |
| GM005847 | hypothetical protein                                    | 1.02  |
| GM005862 | putative nitrate extrusion protein                      | -1.08 |
| GM006066 | putative secreted ribonuclease                          | -1.13 |
| GM006289 | hypothetical protein                                    | -1.42 |
| GM006340 | hypothetical protein                                    | -2.84 |
| GM006412 | putative IclR-family transcriptional regulator          | -2.29 |
| GM006521 | putative hydrolase                                      | -2.77 |
| GM006751 | Putative ABC transporter ATP-binding protein SAV_5847   | 1.37  |
| GM006791 | putative integral membrane protein                      | 2.49  |
| GM007052 | putative RNA polymerase ECF-subfamily sigma factor      | -5.05 |
| GM007190 | putative membrane protein                               | -3.20 |
| GM007217 | putative two-component system response regulator        | 1.57  |
| GM007707 | putative MerR-family transcriptional regulator          | 1.02  |
| GM007923 | \                                                       | 1.95  |

|          |                                                       |       |
|----------|-------------------------------------------------------|-------|
| GM008086 | \                                                     | -1.08 |
| GM008306 | putative ABC transporter ATP-binding protein          | -5.17 |
| GM008344 | Urea amidohydrolase subunit gamma                     | -1.24 |
| GM008348 | Urea amidohydrolase beta gamma                        | -1.35 |
| GM008357 | \                                                     | -1.23 |
| GM008417 | putative aminotransferase                             | -4.83 |
| GM008507 | hypothetical protein                                  | -1.32 |
| GM008693 | protein phosphatase                                   | -3.13 |
| GM008796 | amino acid ABC transporter amino acid-binding protein | -4.44 |
| GM008850 | dehydrogenase                                         | -2.77 |
| GM008864 | hypothetical protein                                  | -1.26 |
| GM009061 | tail protein, partial                                 | -4.55 |
| GM009109 | aromatic compound degradation protein PaaI            | -1.30 |

**Table S5.** Genes significantly differentially expressed at day 6

| Gene id  | Genome description                         | log <sub>2</sub> (fold change) |
|----------|--------------------------------------------|--------------------------------|
| GM000121 | \                                          | 1.22                           |
| GM000177 | putative IS5 family ISJp4-like transposase | 1.39                           |
| GM000335 | hypothetical protein                       | -1.08                          |
| GM000689 | NUDIX hydrolase                            | 2.40                           |
| GM000690 | oleoyl-ACP hydrolase                       | 2.88                           |
| GM000691 | cholesterol oxidase                        | 2.76                           |
| GM000692 | LuxR family transcriptional regulator      | -1.50                          |
| GM000695 | ferredoxine                                | -2.33                          |
| GM000696 | cytochrome P450 hydroxylase                | -2.55                          |
| GM000697 | \                                          | -2.29                          |
| GM000698 | cytochrome P450 hydroxylase                | -2.39                          |
| GM000699 | crotonyl-CoA reductase                     | -2.44                          |
| GM000700 | hypothetical protein                       | -2.25                          |
| GM000701 | Acyl transferase                           | -2.20                          |
| GM000702 | polyketide synthase, partial               | -2.20                          |
| GM000703 | polyketide synthase                        | -2.19                          |
| GM000704 | modular polyketide synthase                | -2.28                          |
| GM000705 | modular polyketide synthase                | -2.29                          |
| GM000706 | modular polyketide synthase                | -2.14                          |
| GM000707 | hypothetical protein, partial              | -2.09                          |
| GM000708 | \                                          | -2.14                          |
| GM000709 | polyketide synthase                        | -2.12                          |
| GM000710 | polyketide synthase                        | -2.27                          |
| GM000711 | hypothetical protein, partial              | -2.19                          |

|          |                                                 |       |
|----------|-------------------------------------------------|-------|
| GM000712 | \                                               | -1.74 |
| GM000713 | \                                               | -2.22 |
| GM000714 | polyketide synthase, partial                    | -2.22 |
| GM000715 | Malonyl CoA-acyl carrier protein transacylase   | -2.25 |
| GM000716 | hypothetical protein, partial                   | -2.26 |
| GM000717 | hypothetical protein, partial                   | -2.14 |
| GM000718 | modular polyketide synthase                     | -2.23 |
| GM000720 | modular polyketide synthase                     | -2.17 |
| GM000721 | modular polyketide synthase                     | -2.35 |
| GM000723 | putative Tn3 family ISXc5-like transposase      | -2.06 |
| GM001082 | hypothetical protein                            | 1.05  |
| GM001103 | hypothetical protein                            | 1.18  |
| GM001109 | putative neutral zinc metalloprotease, secreted | -1.20 |
| GM001111 | \                                               | -1.36 |
| GM001271 | hypothetical protein                            | -2.09 |
| GM001272 | hypothetical protein                            | -2.21 |
| GM001418 | monooxygenase, flavin-binding family            | -1.68 |
| GM001420 | hypothetical protein                            | -1.62 |
| GM001452 | lipoprotein                                     | 1.05  |
| GM001513 | acetyl xylan esterase                           | 1.32  |
| GM001997 | formate dehydrogenase, major subunit            | 1.12  |
| GM002248 | putative trypsin-like protease, secreted        | -1.50 |
| GM002371 | putative integral membrane protein              | -1.34 |
| GM002372 | putative integral membrane protein              | -1.12 |
| GM002580 | inorganic polyphosphate/ATP-NAD kinase          | 1.17  |
| GM002597 | putative high-affinity nickel-transport protein | 1.57  |

|          |                                                      |       |
|----------|------------------------------------------------------|-------|
| GM002996 | putative transmembrane efflux protein                | -1.48 |
| GM002997 | TetR family transcriptional regulator                | -1.01 |
| GM003180 | hypothetical protein                                 | 1.55  |
| GM003209 | peptidase                                            | -1.26 |
| GM003307 | hypothetical protein                                 | 1.95  |
| GM003532 | hypothetical protein                                 | 1.05  |
| GM003574 | putative regulatory protein                          | -1.13 |
| GM003575 | hypothetical protein                                 | -1.04 |
| GM003685 | hypothetical protein                                 | 1.10  |
| GM003877 | hypothetical protein                                 | 1.32  |
| GM003939 | putative regulatory protein                          | 4.17  |
| GM003940 | hypothetical protein                                 | 3.69  |
| GM003975 | putative ABC transporter permease protein            | 1.54  |
| GM003976 | hypothetical protein                                 | 4.92  |
| GM005007 | hypothetical protein                                 | -1.50 |
| GM005008 | hypothetical protein                                 | -1.84 |
| GM005009 | Diaminopimelate epimerase                            | -1.48 |
| GM005010 | aminotransferase                                     | -1.25 |
| GM005011 | peptide synthetase                                   | -1.08 |
| GM005092 | putative peptide ABC transporter permease protein    | 4.31  |
| GM005162 | hypothetical protein                                 | 1.02  |
| GM005256 | \                                                    | 1.75  |
| GM005357 | membrane protein                                     | -1.53 |
| GM005457 | \                                                    | -1.36 |
| GM005458 | hypothetical protein                                 | -1.16 |
| GM005488 | putative peptide ABC transporter ATP-binding protein | 1.56  |

|          |                                                                     |       |
|----------|---------------------------------------------------------------------|-------|
| GM005579 | hypothetical protein                                                | -1.56 |
| GM005992 | putative polar amino acid ABC transporter substrate-binding protein | -1.34 |
| GM006059 | putative sodium: solute symporter                                   | -1.18 |
| GM006079 | hypothetical protein                                                | -1.34 |
| GM006471 | hypothetical protein                                                | 1.38  |
| GM006472 | putative DNA recombination and repair protein                       | 1.59  |
| GM006659 | hypothetical protein                                                | 1.19  |
| GM006727 | \                                                                   | 1.81  |
| GM006752 | cobalt ABC transporter permease                                     | 2.08  |
| GM006923 | putative secreted alpha-amylase                                     | 1.05  |
| GM007003 | membrane protein                                                    | 1.22  |
| GM007004 | collagen triple helix repeat family protein                         | 1.07  |
| GM007061 | hypothetical protein                                                | -1.08 |
| GM007181 | \                                                                   | -1.74 |
| GM007268 | hypothetical protein                                                | -1.24 |
| GM007585 | putative DNA hydrolase                                              | 1.83  |
| GM007586 | putative ADP-ribosylglycohydrolase                                  | 1.68  |
| GM007587 | nucleotidyltransferase                                              | 1.08  |
| GM007910 | putative oxidoreductase                                             | -1.01 |
| GM008263 | membrane protein                                                    | 1.20  |
| GM008359 | LytR family transcriptional regulator                               | 1.23  |
| GM008686 | hypothetical protein                                                | -1.26 |
| GM008745 | \                                                                   | -1.27 |
| GM009092 | 6-phosphogluconate dehydrogenase                                    | -1.33 |



**Table S6.** Genes enriched in metabolic pathways with significant changes after *pteF* deletion

| Metabolic pathway | Gene id  |             | Gene name | Genome description                                                     | log <sub>2</sub> (fold change) |       |
|-------------------|----------|-------------|-----------|------------------------------------------------------------------------|--------------------------------|-------|
|                   | S0       | MA-4680     |           |                                                                        | day 2                          | day 6 |
| Day 2             |          |             |           |                                                                        |                                |       |
| ABC transporters  | GM001184 | SAVERM_1190 | livK1     | ABC transporter substrate-binding protein                              | -1.24                          | -0.78 |
|                   | GM001185 | SAVERM_1191 | livH1     | putative branched-chain amino acid ABC transporter permease protein    | -1.06                          | -0.78 |
|                   | GM001186 | SAVERM_1192 | livM1     | putative branched-chain amino acid ABC transporter permease protein    | -1.08                          | -0.67 |
|                   | GM001187 | SAVERM_1193 | livG1     | putative branched-chain amino acid ABC transporter ATP-binding protein | -1.79                          | -0.78 |
|                   | GM002415 | SAVERM_2178 | opuBC1    | glycine/betaine ABC transporter substrate-binding protein              | -0.66                          | -0.40 |
|                   | GM002424 | SAVERM_2184 | \         | putative ABC transporter permease                                      | -4.50                          | -0.51 |
|                   | GM002494 | SAVERM_2247 | xylF      | ABC transporter substrate-binding protein                              | -0.99                          | -0.30 |
|                   | GM002498 | SAVERM_2251 | ngcE      | ABC transporter substrate-binding protein                              | -0.50                          | 0.01  |
|                   | GM002907 | SAVERM_4980 | msmF      | putative multiple sugar ABC transporter permease protein               | -1.73                          | -0.16 |
|                   | GM006477 | SAVERM_5632 | mntC      | putative zinc/manganese transport system ABC transporter permease      | -0.54                          | 0.04  |
|                   | GM006864 | SAVERM_5940 | oleC5     | putative ABC transporter permease protein                              | 0.91                           | -0.43 |
|                   | GM006865 | SAVERM_5941 | oleC4     | putative ABC transporter ATP-binding protein                           | 0.95                           | -0.45 |
|                   | GM008796 | SAVERM_7408 | \         | amino acid ABC transporter amino acid-binding protein                  | -4.44                          | -0.02 |
| Sulfur metabolism |          |             |           |                                                                        |                                |       |
|                   | GM002592 | SAVERM_2330 | narB      | putative assimilatory nitrate reductase large subunit                  | -1.39                          | -0.28 |

|                                               |          |             |              |                                                              |       |       |
|-----------------------------------------------|----------|-------------|--------------|--------------------------------------------------------------|-------|-------|
| Nitrogen metabolism                           | GM001201 | SAVERM_1208 |              | alkanesulfonate monooxygenase                                | -3.71 | 0.14  |
|                                               | GM006513 | SAVERM_5661 | <i>nirB</i>  | putative nitrite reductase (NAD(P)H) large subunit           | -0.87 | -0.33 |
|                                               | GM005862 | SAVERM_5119 | <i>narK</i>  | putative nitrate extrusion protein                           | -1.08 | -0.18 |
|                                               | GM006947 | SAVERM_5997 | <i>glnA2</i> | putative glutamine synthetase                                | -0.56 | -0.40 |
| Propanoate metabolism                         |          |             |              |                                                              |       |       |
|                                               | GM002244 | SAVERM_2031 | <i>acsA4</i> | putative acetyl-CoA synthetase                               | 0.62  | 0.85  |
|                                               | GM008417 | SAVERM_7160 | \            | putative aminotransferase                                    | -4.83 | 0.86  |
|                                               | GM006049 | SAVERM_5277 | <i>accA1</i> | putative acetyl/propionyl CoA carboxylase alpha subunit      | 0.58  | 0.03  |
| Day 6 Glyoxylate and dicarboxylate metabolism |          |             |              |                                                              |       |       |
|                                               | GM002244 | SAVERM_2031 | <i>acsA4</i> | putative acetyl-CoA synthetase                               | 0.62  | 0.85  |
|                                               | GM000699 | SAVERM_414  | <i>pteB</i>  | crotonyl-CoA reductase                                       | -1.96 | -2.44 |
|                                               | GM002508 | SAVERM_2258 | <i>acnA</i>  | aconitate hydratase                                          | -0.29 | -0.35 |
|                                               | GM000609 | SAVERM_348  | <i>katB</i>  | putative catalase                                            | 0.07  | -0.51 |
|                                               | GM006881 | SAVERM_5954 | <i>glnA1</i> | \                                                            | -0.03 | -0.40 |
|                                               | GM006947 | SAVERM_5997 | <i>glnA2</i> | putative glutamine synthetase                                | -0.56 | -0.40 |
| Two-component system                          |          |             |              |                                                              |       |       |
|                                               | GM008744 | SAVERM_7366 | <i>hydA</i>  | putative cytochrome C3-like [NiFe] hydrogenase small subunit | 0.06  | -0.74 |

|                                     | GenBank  | SAVERM      | Gene         | Function                                                     | SAVERM | GenBank |
|-------------------------------------|----------|-------------|--------------|--------------------------------------------------------------|--------|---------|
| Biosynthesis of various antibiotics | GM007121 | SAVERM_6139 | <i>phoD1</i> | putative alkaline phosphatase                                | -0.30  | -0.56   |
|                                     | GM008746 | SAVERM_7367 | <i>hydB</i>  | putative cytochrome C3-like [NiFe] hydrogenase large subunit | -0.07  | -0.60   |
|                                     | GM006947 | SAVERM_5997 | <i>glnA2</i> | putative glutamine synthetase                                | -0.56  | -0.40   |
|                                     | GM006881 | SAVERM_5954 | <i>glnA1</i> |                                                              | -0.03  | -0.40   |
|                                     | GM000696 | SAVERM_412  | <i>pteD</i>  | cytochrome P450 hydroxylase                                  | -1.98  | -2.55   |
| D-Amino acid metabolism             | GM008419 | SAVERM_7162 | <i>cysK3</i> | putative cysteine synthase                                   | -0.34  | -0.67   |
| Glycerolipid metabolism             | GM005009 | SAVERM_3161 | <i>dapF2</i> | Diaminopimelate epimerase                                    | -0.93  | -1.48   |
|                                     | GM006060 | SAVERM_5285 | <i>speB</i>  | putative agmatinase                                          | 0.34   | -0.63   |
|                                     | GM008682 | SAVERM_7323 | <i>avsD</i>  | putative diaminopimelate decarboxylase                       | 0.37   | 0.97    |
|                                     | GM007693 | SAVERM_6595 | \            | putative aldehyde dehydrogenase                              | 0.03   | -0.50   |
| Propanoate metabolism               | GM007927 | SAVERM_6783 | <i>plsC4</i> | putative 1-acylglycerol-3-phosphate O-acyltransferase        | -0.09  | -0.42   |
|                                     | GM008560 | SAVERM_7256 | <i>tgs</i>   | \                                                            | -0.42  | -0.64   |
|                                     | GM006049 | SAVERM_5277 | <i>accA1</i> | putative acetyl/propionyl CoA carboxylase alpha subunit      | 0.58   | 0.03    |
|                                     | GM002244 | SAVERM_2031 | <i>acsA4</i> | putative acetyl-CoA synthetase                               | 0.62   | 0.85    |

|                 |                    |                  |                                                                           |      |       |
|-----------------|--------------------|------------------|---------------------------------------------------------------------------|------|-------|
| <i>GM004760</i> | <i>SAVERM_3382</i> | <i>mcmA</i><br>2 | putative methylmalonyl-CoA mutase, alpha subunit                          | 0.33 | -0.47 |
| <i>GM003600</i> | <i>SAVERM_4376</i> | <i>bkdF</i>      | putative branched-chain alpha keto acid<br>dehydrogenase E1 alpha subunit | 0.08 | -0.36 |

## References

1. Kieser, T.; Bibb, M.J.; Buttner, M.J.; Chater, K.F.; Hopwood, D.A. Practical *Streptomyces* genetics. *John Innes Found. Norwich*. **2000**; Volume 291.
2. Bierman, M.; Logan, R.; O'Brien, K.; Seno, E.T.; Rao, R.N.; Schonert, B.E. Plasmid cloning vectors for the conjugal transfer of DNA from *Escherichia coli* to *Streptomyces* spp. *Gene*. **1992**, 116, 43–49.
